# Supplementary material for: Two Cu(ii)-triadimenol complexes as potential fungicides: synergistic actions and DFT calculations
Source: Royal Society of Chemistry journal article supplement (doi:10.1039/c7ra10572j), 2018-01-01
Supplement: c7ra10572j1.pdf [file c7ra10572j1.pdf]

## Supporting Information

### **Two Cu(II)-triadimenol complexes as potential fungicides: synergistic actions and DFT calculations**

Jie Li,<sup>a</sup> Huiyu Liu,<sup>a</sup> Zhaoqi Guo,<sup>a</sup> Mingyan Yang,<sup>b</sup> Jirong Song,<sup>a, c</sup> and Haixia Ma<sup>\*a</sup>

<sup>a</sup> School of Chemical Engineering, Northwest University, Xi'an, Shaanxi 710069, China. E-mail: mahx@nwu.edu.cn; Tel./fax: +86-029-88307755

<sup>b</sup> Department of Environmental Science and Engineering, Chang'an University, Xi'an, Shaanxi 710054, China.

<sup>c</sup> Conservation Technology Department, the Palace Museum, Beijing 100009, China.

**Figure and table captions**

**Figure S1.** UV-Vis spectra of two complexes and the ligand **L**.

**Figure S2.** EPR spectra of two complexes.

**Figure S3.** Thermal dependence of the  $X_M T$  product for complexes **1-2**.

**Table S1.** Selected structural parameters by X-ray and theoretical calculations for both complexes.

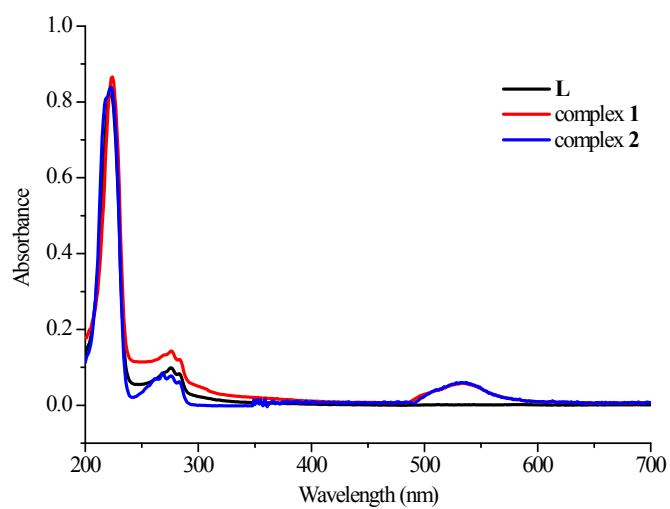

Fig. S1 UV-Vis spectra of two complexes and the ligand **L**.

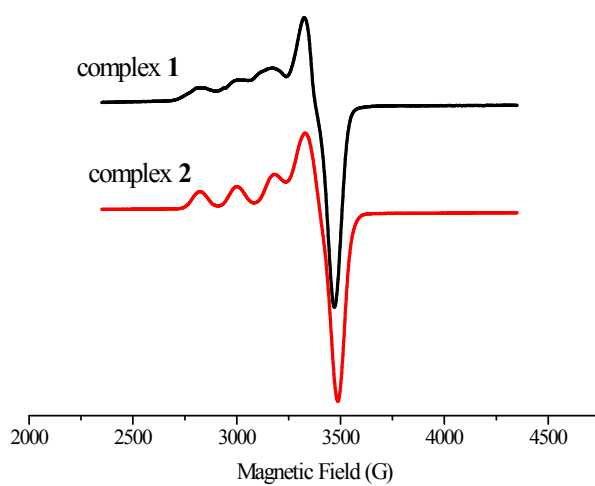

Fig. S2 EPR spectra of two complexes.

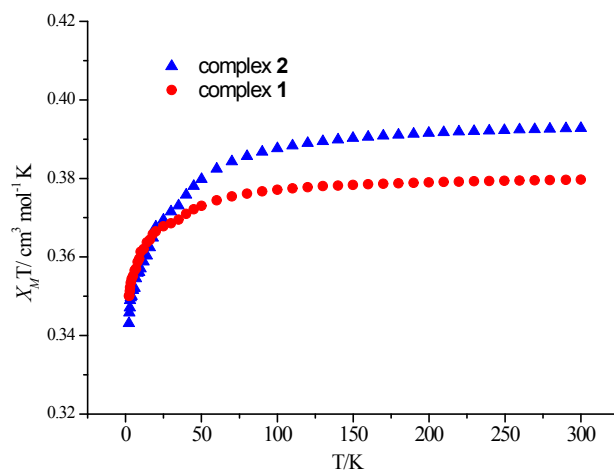

Fig. S3 Thermal dependence of the  $X_M T$  product for complexes **1-2**.

Table S1 Selected structural parameters by X-ray and theoretical calculations for both complexes.

|                 | Complex <b>1</b> |        | Complex <b>2</b> |            |        |
|-----------------|------------------|--------|------------------|------------|--------|
|                 | Expt.            | Calcd. | Expt.            | Calcd.     |        |
| Bond lengths(Å) |                  |        | Bond lengths(Å)  |            |        |
| Cu–N1           | 2.035(2)         | 2.127  | Cu–N1            | 1.9950(18) | 2.036  |
| Cu–N4           | 2.030(2)         | 2.113  | Cu–O1            | 2.6610(27) | 2.783  |
| Cu–O9w          | 2.392(2)         | 2.544  | Cu–O2            | 1.9410(16) | 1.992  |
| C1–N1           | 1.323(4)         | 1.333  | C1–N1            | 1.351(3)   | 1.370  |
| N1–C2           | 1.350(4)         | 1.349  | N1–C2            | 1.320(3)   | 1.337  |
| C2–N3           | 1.307(4)         | 1.365  | C2–N2            | 1.324(3)   | 1.342  |
| N3–N2           | 1.364(3)         | 1.326  | N2–N3            | 1.354(3)   | 1.368  |
| Bond angles (°) |                  |        | Bond angles (°)  |            |        |
| N1–Cu–N1i       | 180.00(13)       | 180.00 | N1–Cu–N1i        | 180.00(12) | 180.00 |
| N4–Cu–N4i       | 180.00(18)       | 180.00 | O2–Cu–O2i        | 180.00(13) | 180.00 |
| O9w–Cu–O9wi     | 180.00(11)       | 180.00 | O1–Cu–O1i        | 180.00(1)  | 180.00 |
| N1–Cu–N4        | 91.01(9)         | 95.789 | N1–Cu–O2         | 89.13(7)   | 90.211 |
| N1–Cu–N4i       | 88.99(9)         | 90.277 | N1–Cu–O1         | 93.598(73) | 95.789 |

Symmetry code: complex **1** (i)  $-x + 2, -y + 1, -z$ ; complex **2** (ii)  $-x + 1, -y + 1, -z + 2$ .
